# Supplementary material
Source: PubMed Central journal article supplement (PMC8221064)
Supplement: NIHMS1709878-supplement-sup.pdf [file NIHMS1709878-supplement-sup.pdf]

# Asymmetrical Multi-Task Attention U-Net for the Segmentation of Prostate Bed in CT Image

## Supplementary Material

Xuanang Xu<sup>1</sup>, Chunfeng Lian<sup>1</sup>, Shuai Wang<sup>1</sup>, Andrew Wang<sup>2</sup>, Trevor Royce<sup>2</sup>,  
Ronald Chen<sup>2</sup>, Jun Lian<sup>2</sup>, and Dinggang Shen<sup>1</sup>

- <sup>1</sup> Department of Radiology and BRIC, University of North Carolina at Chapel Hill, Chapel Hill, NC 27599, USA  
dinggang.shen@gmail.com
- <sup>2</sup> Department of Radiation Oncology, University of North Carolina at Chapel Hill, Chapel Hill, NC 27599, USA  
jun.lian@med.unc.edu

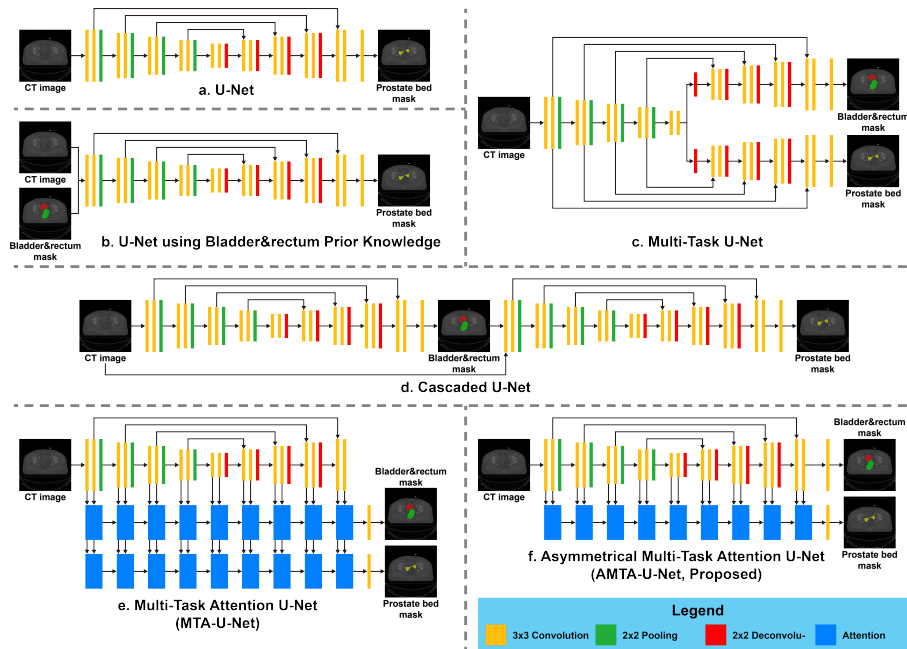

**Fig. 1.** Network architectures of the models evaluated in Section 3.2 (a and b) and Section 3.3 (a, c, d, e, and f).

**Table 1.** Different properties possessed by the deep learning-based models evaluated in Section 3.3.

| Models           | Properties          |                                   |                     |
|------------------|---------------------|-----------------------------------|---------------------|
|                  | Multi-task learning | Asymmetrical network architecture | Attention mechanism |
| U-Net            | ×                   | ×                                 | ×                   |
| Multi-task U-Net | ✓                   | ×                                 | ×                   |
| Cascaded U-Net   | ✓                   | ✓                                 | ×                   |
| MTA-U-Net        | ✓                   | ×                                 | ✓                   |
| Proposed         | ✓                   | ✓                                 | ✓                   |
